# Supplementary material for: Intense phototautomer emission of 2-(3′-pyridyl)benzimidazole encapsulated in Nafion membrane
Source: Royal Society of Chemistry journal article supplement (doi:10.1039/c2ra21070c), 2012-11-14
Supplement: c2ra21070c.pdf [file c2ra21070c.pdf]

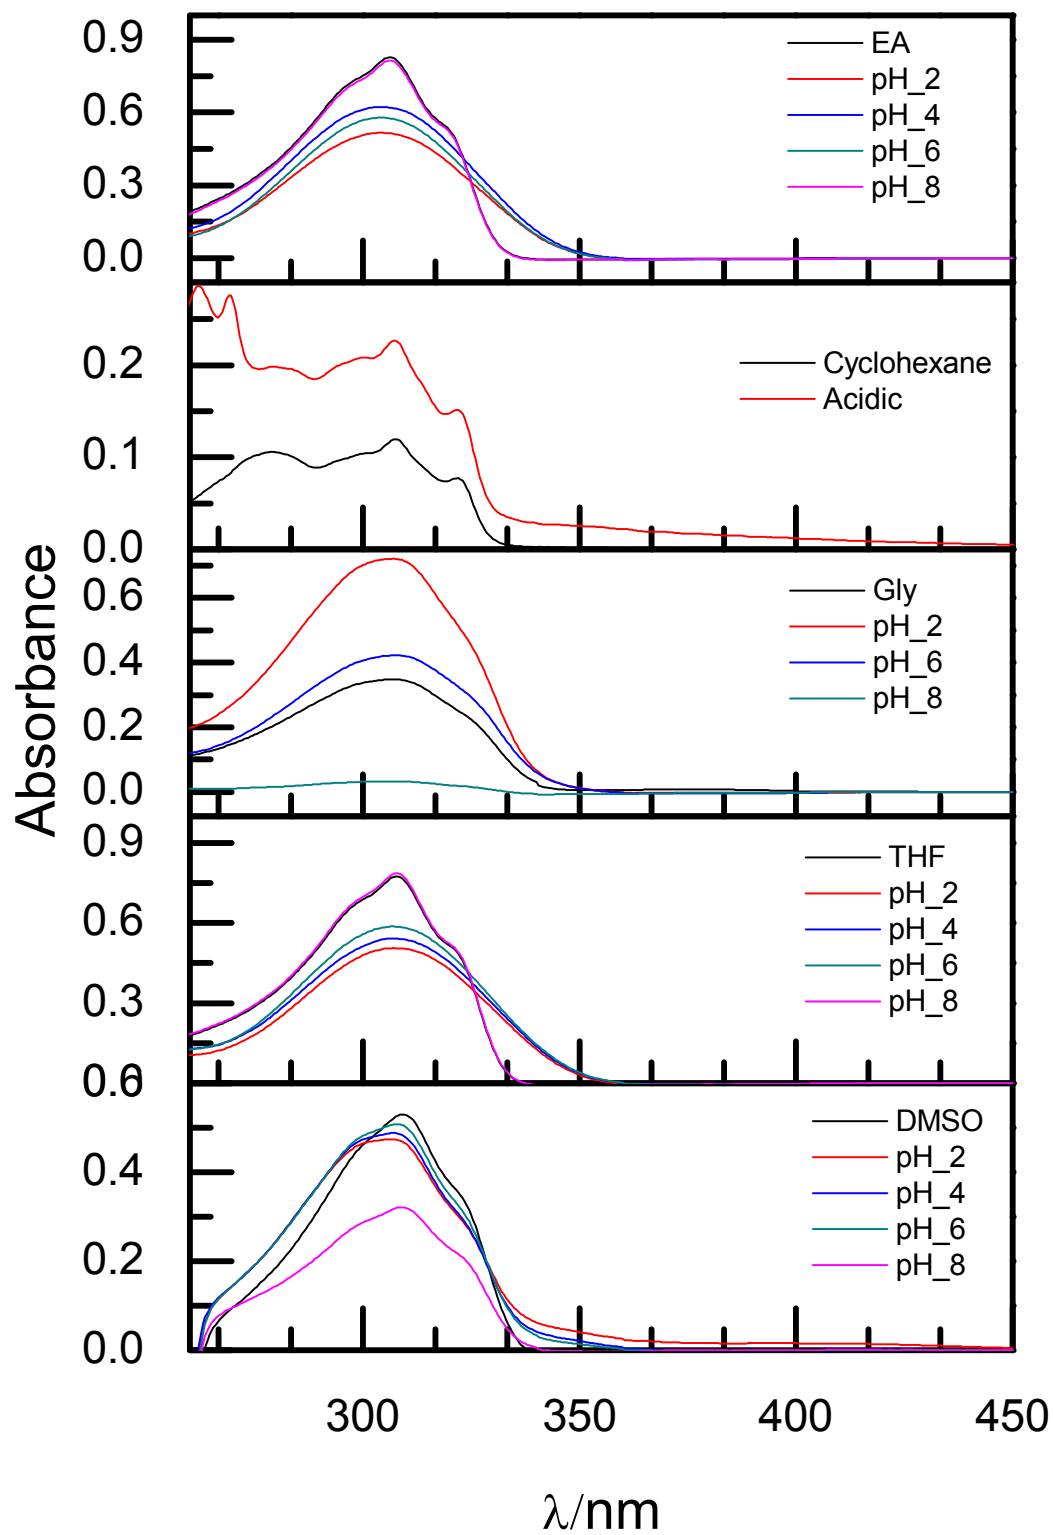

Figure S1: Absorption spectrum of 3PBI in various solvents and at different  $H^+$  concentrations.

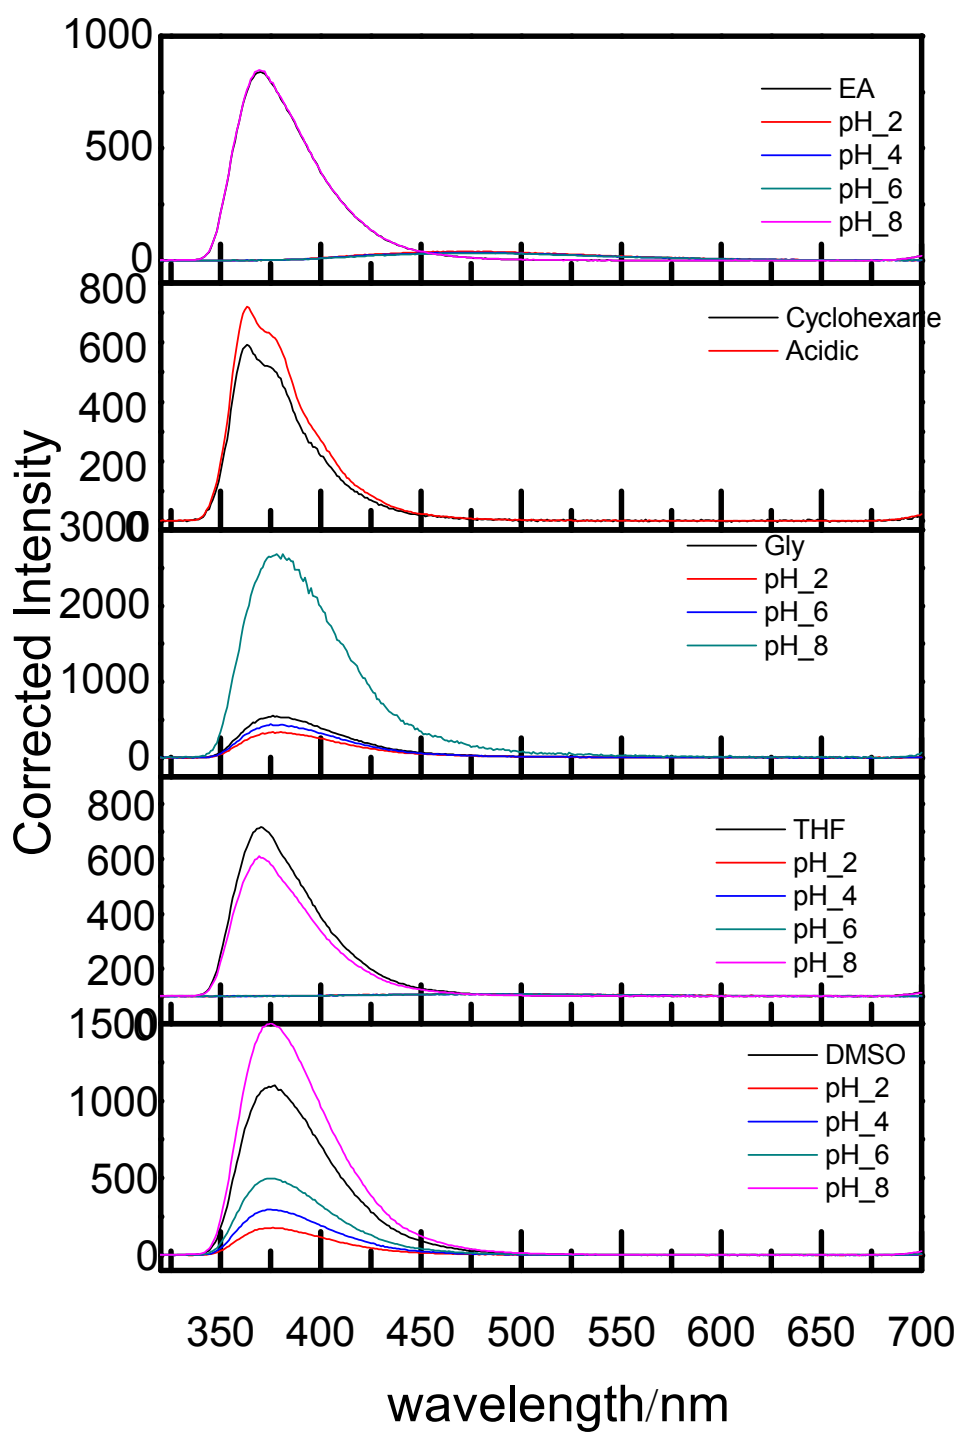

Figure: S2 Fluorescence spectrum of 3PBI in different solvents at different  $H^+$  concentrations.

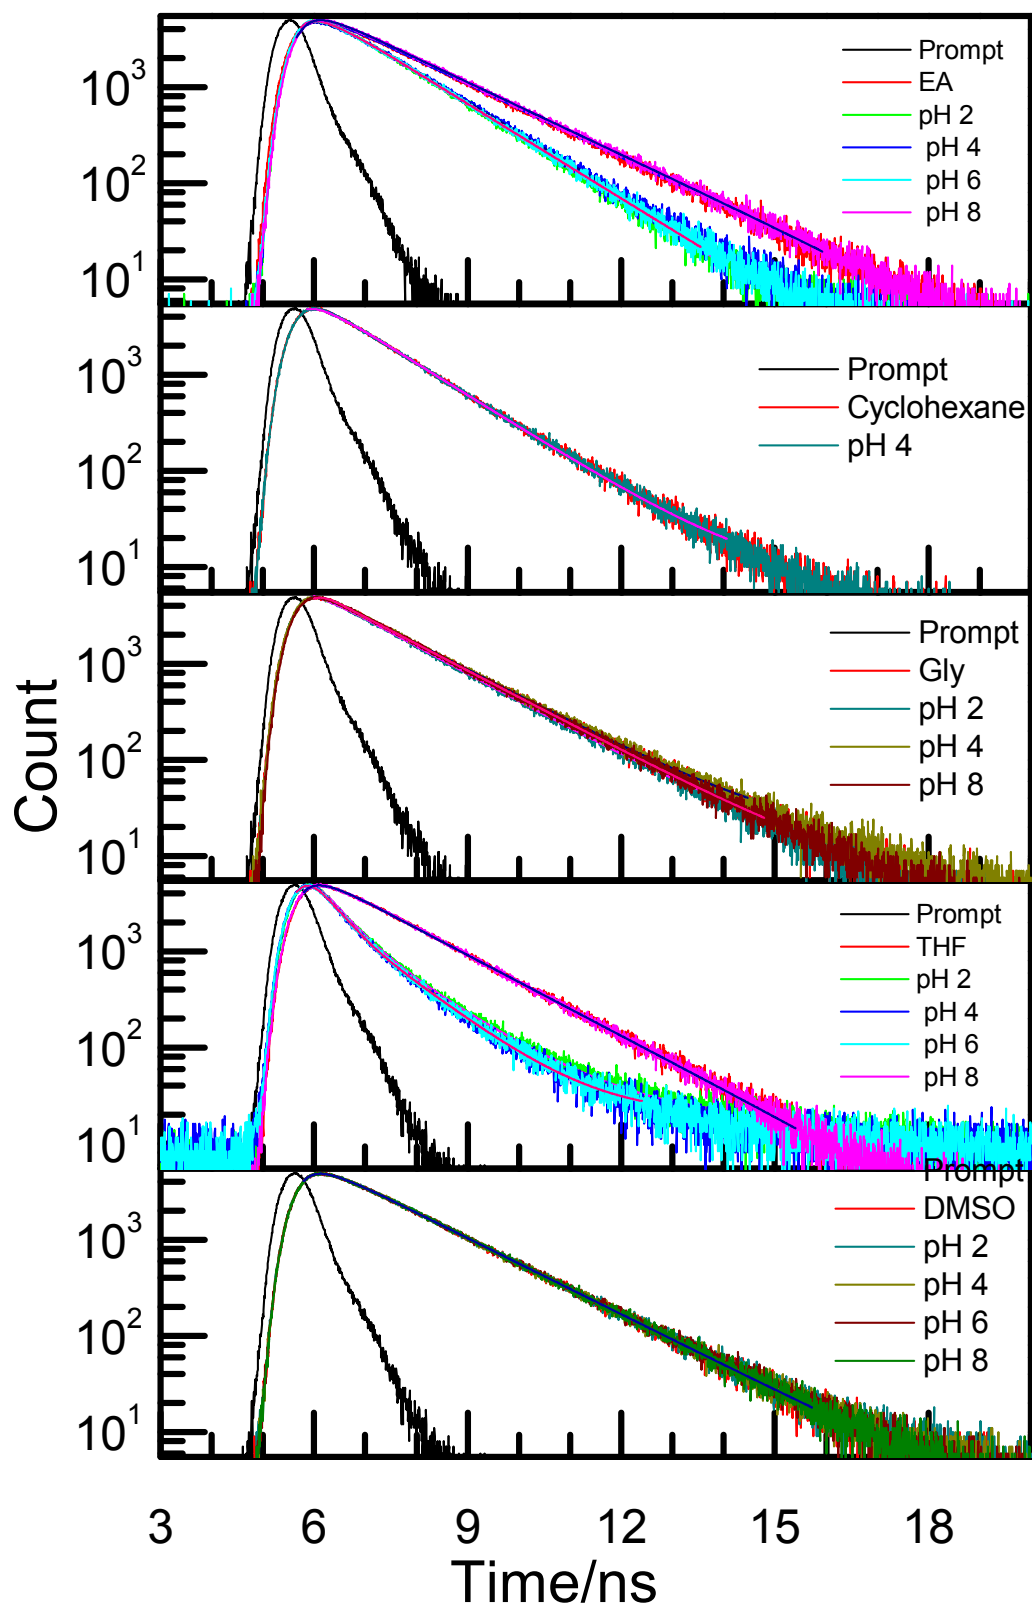

Figure S3. Temporal features of fluorescence of 3PBI

Figure S4. Optimized structure of 3PBI in ground state

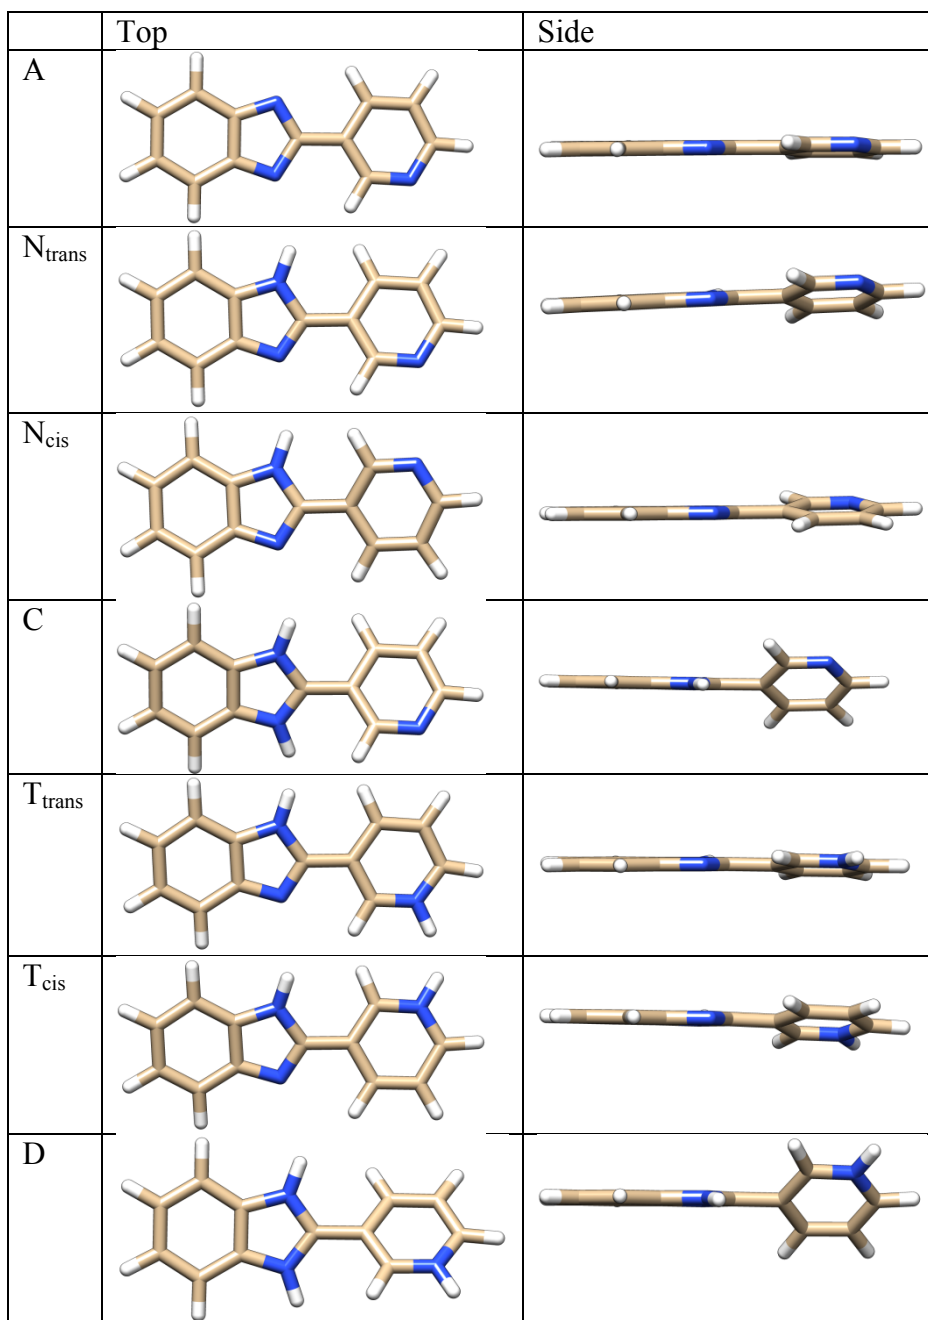

Figure S5. Optimized structure of 3PBI in excited state

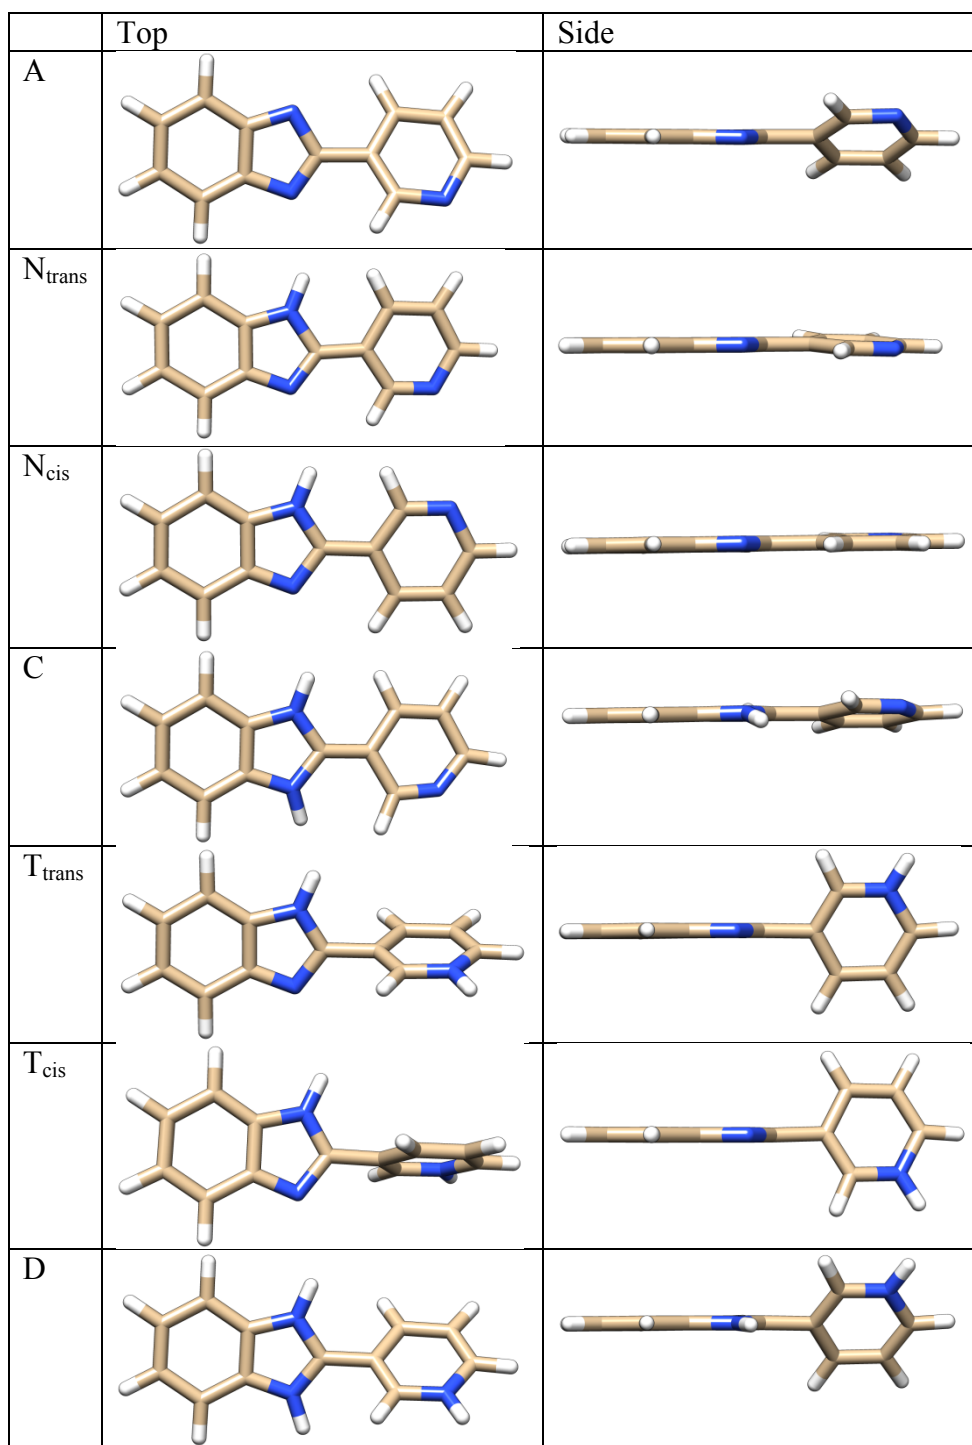

Table S1. Calculated photophysical properties of 3PBI using B3LYP/TZVP level.<sup>a</sup>

| Ground state                     | A                              | N <sub>trans</sub>   | C          | T <sub>trans</sub>   | D          |
|----------------------------------|--------------------------------|----------------------|------------|----------------------|------------|
| Optimized structure <sup>a</sup> | <br>-0.227<br>-0.231<br>-0.160 | <br>-0.196<br>-0.173 | <br>-0.157 | <br>-0.178           | <br>-0.197 |
| HOMO                             |                                |                      |            |                      |            |
| LUMO                             |                                |                      |            |                      |            |
| $\omega^b$                       | -4                             | -15                  | -36        | -7                   | -42        |
| PA <sup>c</sup>                  | -                              | -47.7                | -29.8      | -30.0                | -23.5      |
| Excited state                    | A*                             | N <sub>trans</sub> * | C*         | T <sub>trans</sub> * | D*         |
| Optimized structure <sup>a</sup> | <br>-0.309<br>-0.259<br>-0.199 | <br>-0.185<br>-0.174 | <br>-0.160 | <br>-0.197           |            |
| $\omega^b$                       | -28                            | 4                    | -9         | -77                  | -49        |
| PA <sup>c</sup>                  | -                              | -39.4                | -41.2      | -49.9                | -12.6      |

<sup>a</sup> Löwdin charges (in a.u) on nitrogens are shown

<sup>b</sup>  $\omega$  denotes dihedral angles (in degrees) between the two heterocyclic rings

<sup>c</sup> PA denotes proton affinity (kcal mol<sup>-1</sup>)

Table S2: Anisotropy of 3PBI in various solvents and nafion at different hydration levels

| System                   | Anisotropy |
|--------------------------|------------|
| Cyclohexane              | 0.0224     |
| DMSO                     | 0.04174    |
| EA                       | 0.01674    |
| THF                      | 0.02899    |
| Gly                      | 0.29812    |
| Nafion ( $\lambda = 6$ ) | 0.00601    |
| Nafion ( $\lambda = 1$ ) | 0.32509    |

Table S3: Temporal features of fluorescence of 3PBI in various solvents at different acid concentrations.

| Solvents      |              | $\tau_1/\text{ps}$ | $\tau_2/\text{ps}$ | $a_1$ | $a_2$ | $\chi^2$ |
|---------------|--------------|--------------------|--------------------|-------|-------|----------|
| Cyclohexane   | Neat solvent | 1340±2             |                    |       |       | 1.08     |
|               | pH4          | 1300±2             |                    |       |       | 1.09     |
| Glycerol      | Neat solvent | 1560±2             |                    |       |       | 1.07     |
|               | pH2          | 1500±3             |                    |       |       | 1.19     |
|               | pH6          | 1580±2             |                    |       |       | 1.06     |
|               | pH8          | 1560±2             |                    |       |       | 1.16     |
| DMSO          | Neat solvent | 1628±2             |                    |       |       | 1.05     |
|               | pH2          | 1638±2             |                    |       |       | 1.06     |
|               | pH4          | 1635±2             |                    |       |       | 1.02     |
|               | pH6          | 1628±2             |                    |       |       | 1.03     |
| Ethyl acetete | pH8          | 1644±2             |                    |       |       | 1.00     |
|               | Neat solvent | 1711±2             |                    |       |       | 1.01     |
|               | pH2          | 1299±2             |                    |       |       | 1.03     |
|               | pH4          | 1359±2             |                    |       |       | 1.11     |
| THF           | pH6          | 1321±2             |                    |       |       | 1.10     |
|               | pH8          | 1733±2             |                    |       |       | 1.03     |
|               | Neat solvent | 1526±2             | --                 | --    | --    | 1.12     |
|               | pH2          | 1315±18            | 500±4              | 0.27  | 0.73  | 1.11     |
|               | pH4          | 1180±18            | 300±4              | 0.19  | 0.81  | 1.63     |
|               | pH6          | 1328±52            | 500±6              | 0.25  | 0.75  | 1.66     |
|               | pH8          | 1555±2             | --                 | --    | --    | 1.07     |
